# Supplementary material for: Barriers and facilitators to effective cervical cancer screening in Belize: a qualitative analysis
Source: Springer Nature journal article supplement (doi:10.1007/s10552-023-01703-0), 2023-05-11
Supplement: MOESM1 [file 25345962]

Semi-Structured Interview Questions:

1. General
  - a. **What is the current situation regarding cervical cancer in Belize?**
    - i. Is cervical cancer a problem in Belize?
    - ii. Is cervical cancer a problem in your community?
    - iii. Please describe the role of your facility/self in cervical cancer prevention and treatment.
2. Demographics
  - a. **What are the demographics of the community you serve?**
    - i. What is the predominant ethnicity in the community you serve?
    - ii. *What are the values of the community you serve as it relates to sexual health and vaccination?*
3. Primary Prevention
  - a. **How does your facility serve the HPV vaccination effort?**
    - i. What are your thoughts on the HPV Vaccine?
    - ii. What are the challenges of the HPV vaccination effort?
    - iii. Has the HPV vaccination effort been successful in your community?
4. Secondary Prevention
  - a. **How does your facility serve the cervical cancer screening effort?**
    - i. What screening services does your facility/self provide?
    - ii. What are the challenges of cervical cancer screening in Belize and in your community?
    - iii. What other tools are you aware of that could be used for cervical cancer screening?  
[Follow-up and ask about HPV DNA Testing]
    - iv. Have the screening efforts [VIA and/or Pap and/or other] been successful in your community?
    - v. *Do patients need to pay for screening services?*
5. Monitoring and Evaluation
  - a. **What systems do you/your facility have in place for collecting patient/service data?**
  - b. **What systems do you/your facility have in place for quality assurance?**
    - i. Do you believe you have too much, too little or a good amount of work to complete as it relates to tracking patient/service data?
    - ii. *Does your facility have a cancer registry?*
      1. Would a cancer registry be a feasible implementation?
    - iii. *What is the highest fidelity tool for tracking patient information?*
    - iv. What are the challenges with tracking patient/service data?
6. Comments on Capacity \*late iteration\*
  - a. *What is the status of the human resources as it relates to your role/facility?*
  - b. *What is the status of the infrastructure as it relates to your role/facility?*
  - c. *What is the status of funding for your services at your facility?*
  - d. *What is the status of policy implementation and development at your facility?*
